# Supplementary material for: How Well is the Medical Home Working for Latino and Black Children?
Source: Springer Nature journal article supplement (doi:10.1007/s10995-017-2389-6), 2017-11-10
Supplement: MOESM1 [file 15213456]

**APPENDIX 1**

NSCH survey items used for healthcare outcome measures
